# Supplementary material for: Storage of Na in 2D SnS for Na ion batteries: a DFT prediction
Source: Royal Society of Chemistry journal article supplement (doi:10.1039/d2cp02780a), 2022-01-01
Supplement: d2cp02780a1.pdf [file d2cp02780a1.pdf]

## Storage of Na in 2D SnS for Na ion batteries: A DFT Prediction

Mehwish Khalid Butt<sup>a</sup>, Javed Rehman<sup>b</sup>, Zhao Yang<sup>c</sup>, Shuanhu Wang<sup>a</sup>, Ahmed El-Zatahry<sup>d</sup>,  
Ayman S. Alofi<sup>e</sup>, Munirah D. Albaqami<sup>f</sup>, Reham Ghazi Alotabi<sup>f</sup>, Amel Laref<sup>g</sup>, Jin Kexin<sup>a\*</sup>,  
Mohamed F. Shibl<sup>h\*</sup>

<sup>a</sup> Shaanxi Key Laboratory of Condensed Matter Structures and Properties and MOE Key Laboratory of Materials Physics and Chemistry, School of Science, Northwestern Polytechnical University, Xi'an 710072, China

<sup>b</sup> Department of Physics, Balochistan University of Information Technology, Engineering and Management Sciences (BUITEMS), Quetta 87300, Pakistan

<sup>c</sup> Hebei Normal University, Shijiazhuang, Hebei 050024, China

<sup>d</sup> Material Science and Technology Program, College of Arts and Sciences, Qatar University, 2713, Doha, Qatar

<sup>e</sup> Department of Physics, College of Science, Taibah University, Medina, Saudi Arabia

<sup>f</sup> Department of Chemistry, College of Science, King Saud University, Riyadh, 11451, Saudi Arabia

<sup>g</sup> Department of Physics and Astronomy, College of Science, King Saud University, Riyadh, 11451 King Saudi Arabia

<sup>h</sup> Renewable Energy Program, Center for Sustainable Development, College of Arts and Sciences, Qatar University, 2713 Doha, Qatar

### Corresponding Authors

Dr. Jin Kexin (jinkx@nwpu.edu.cn) and Prof. Mohamed F. Shibl (mfshibl@cu.edu.eg)

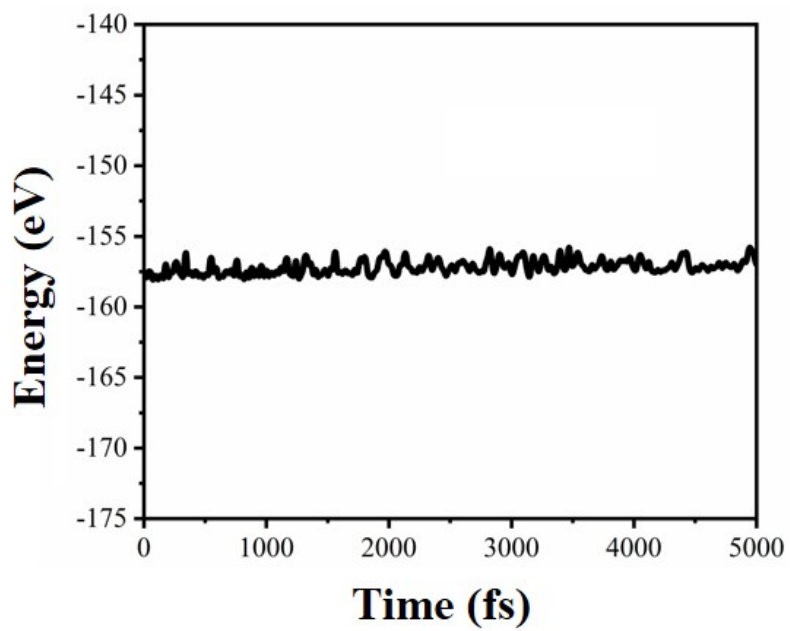

**Fig. S1.** AIMD simulations of SnS monolayer at 300 K for 5000 fs.

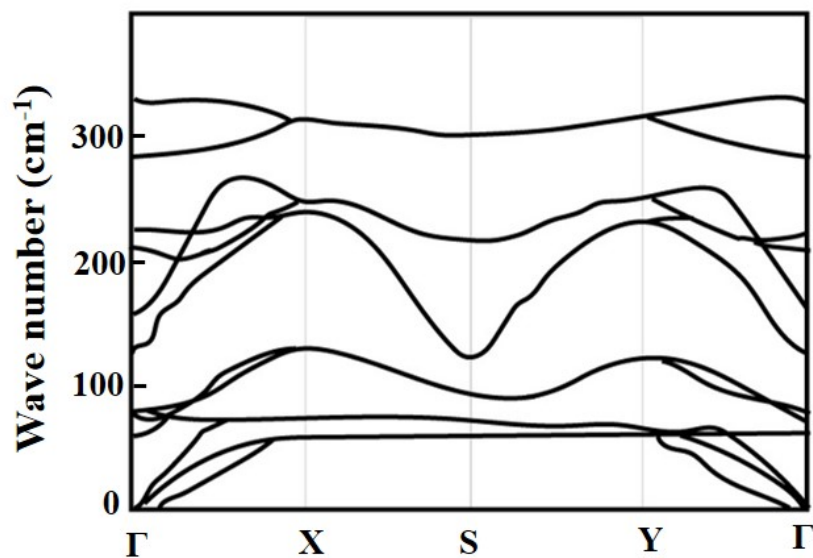

**Fig. S2.** Phonon dispersion of SnS sheet

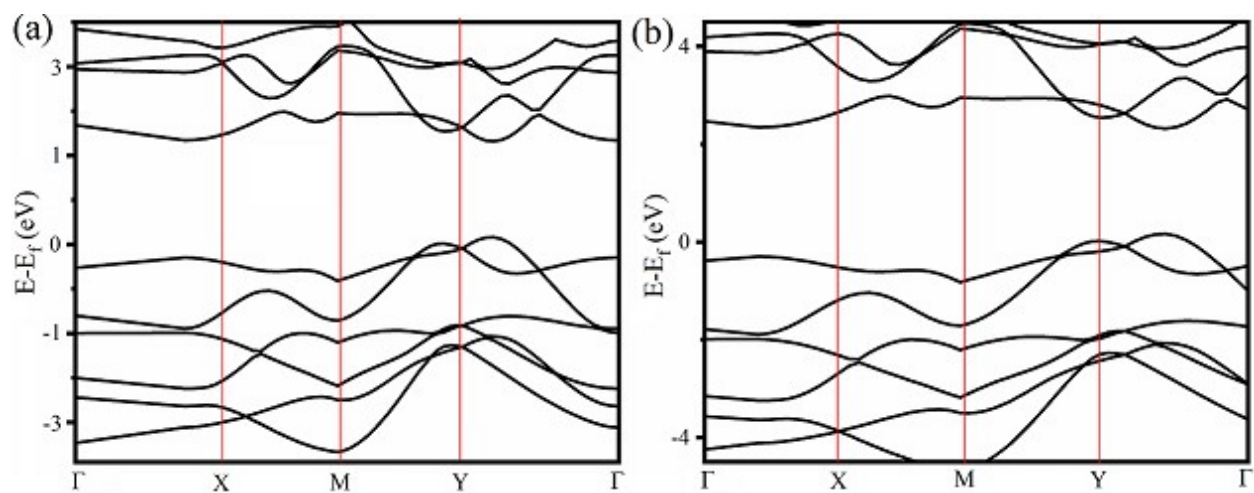

**Fig. S3** The band structure of pristine SnS monolayer using (a) GGA-PBE and (b)

HSE06 functional
